# Supplementary material for: Spinal muscular atrophy within Amish and Mennonite populations: Ancestral haplotypes and natural history
Source: PubMed Central journal article supplement (PMC6126807; doi:10.1371/journal.pone.0202104), 2018-09-06

**A**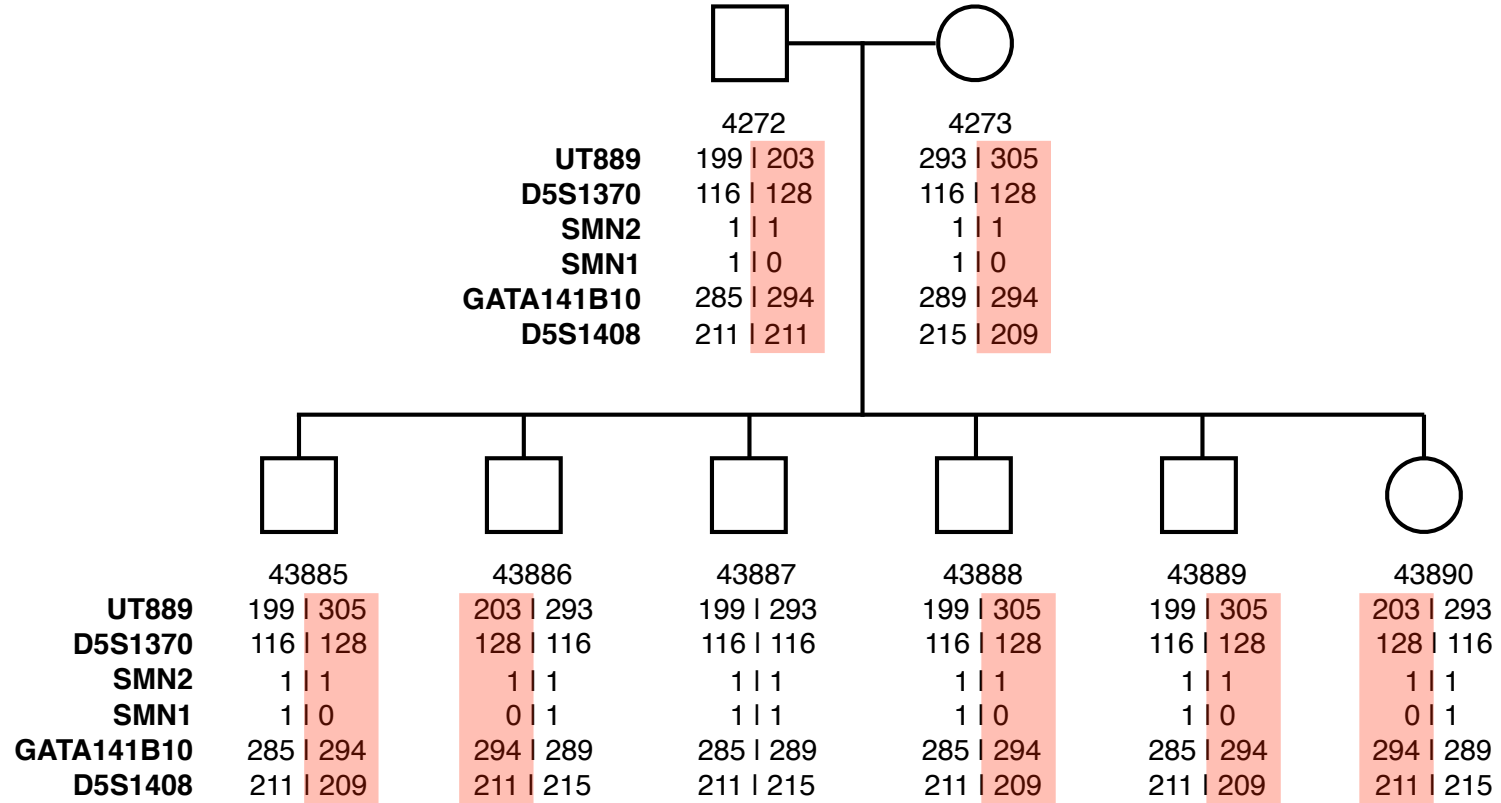

**B**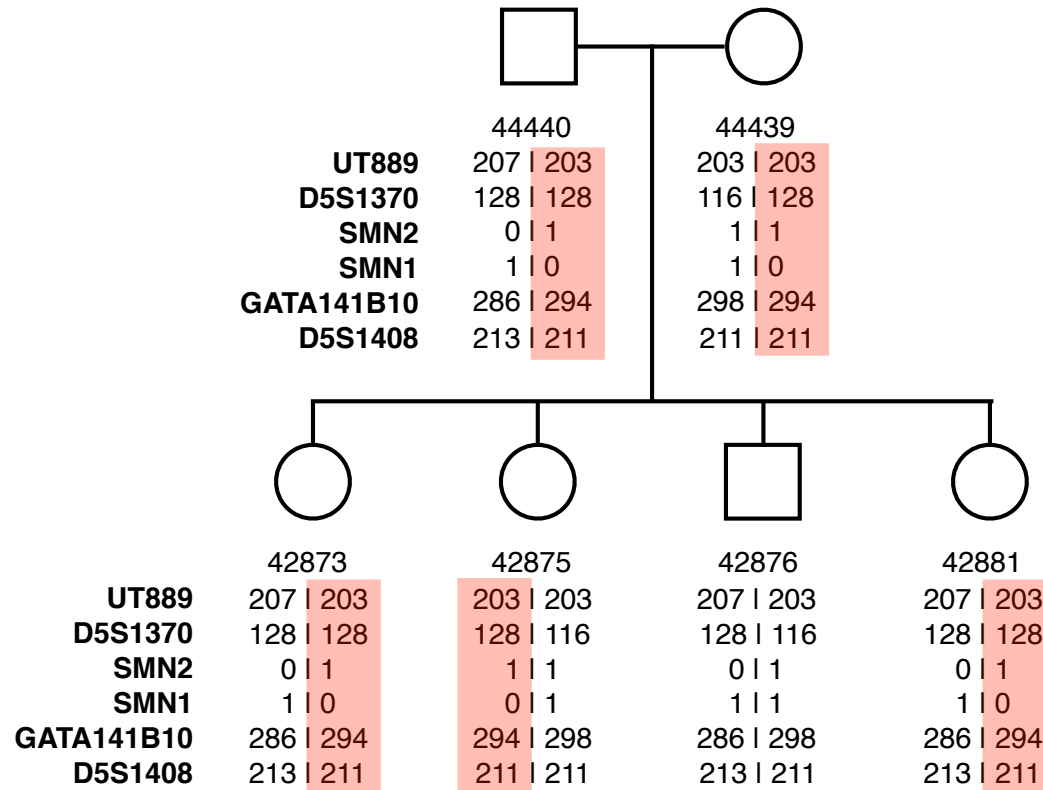

C

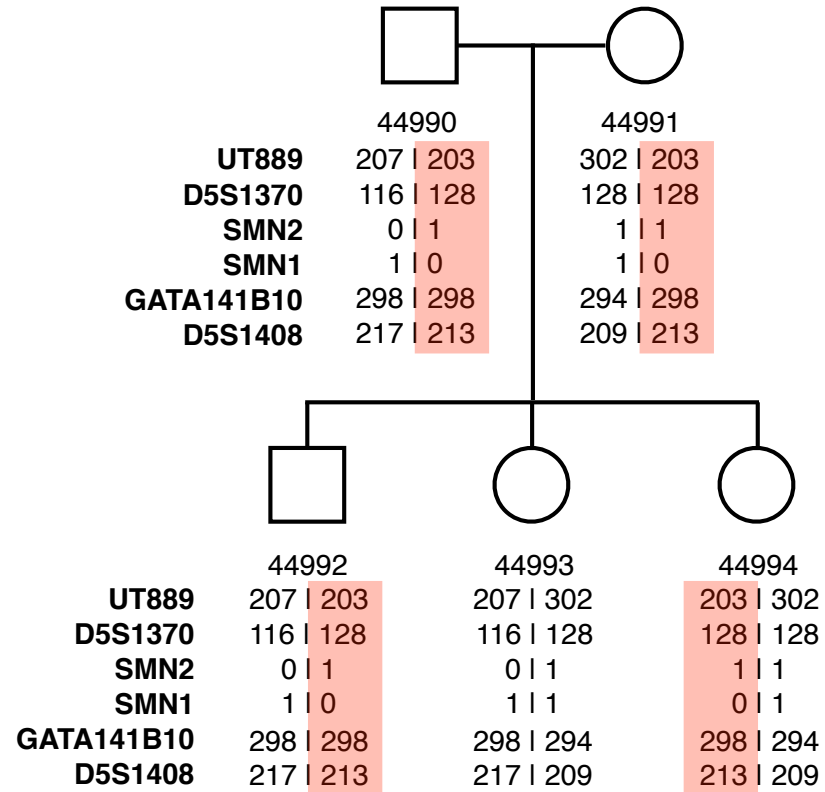

**D**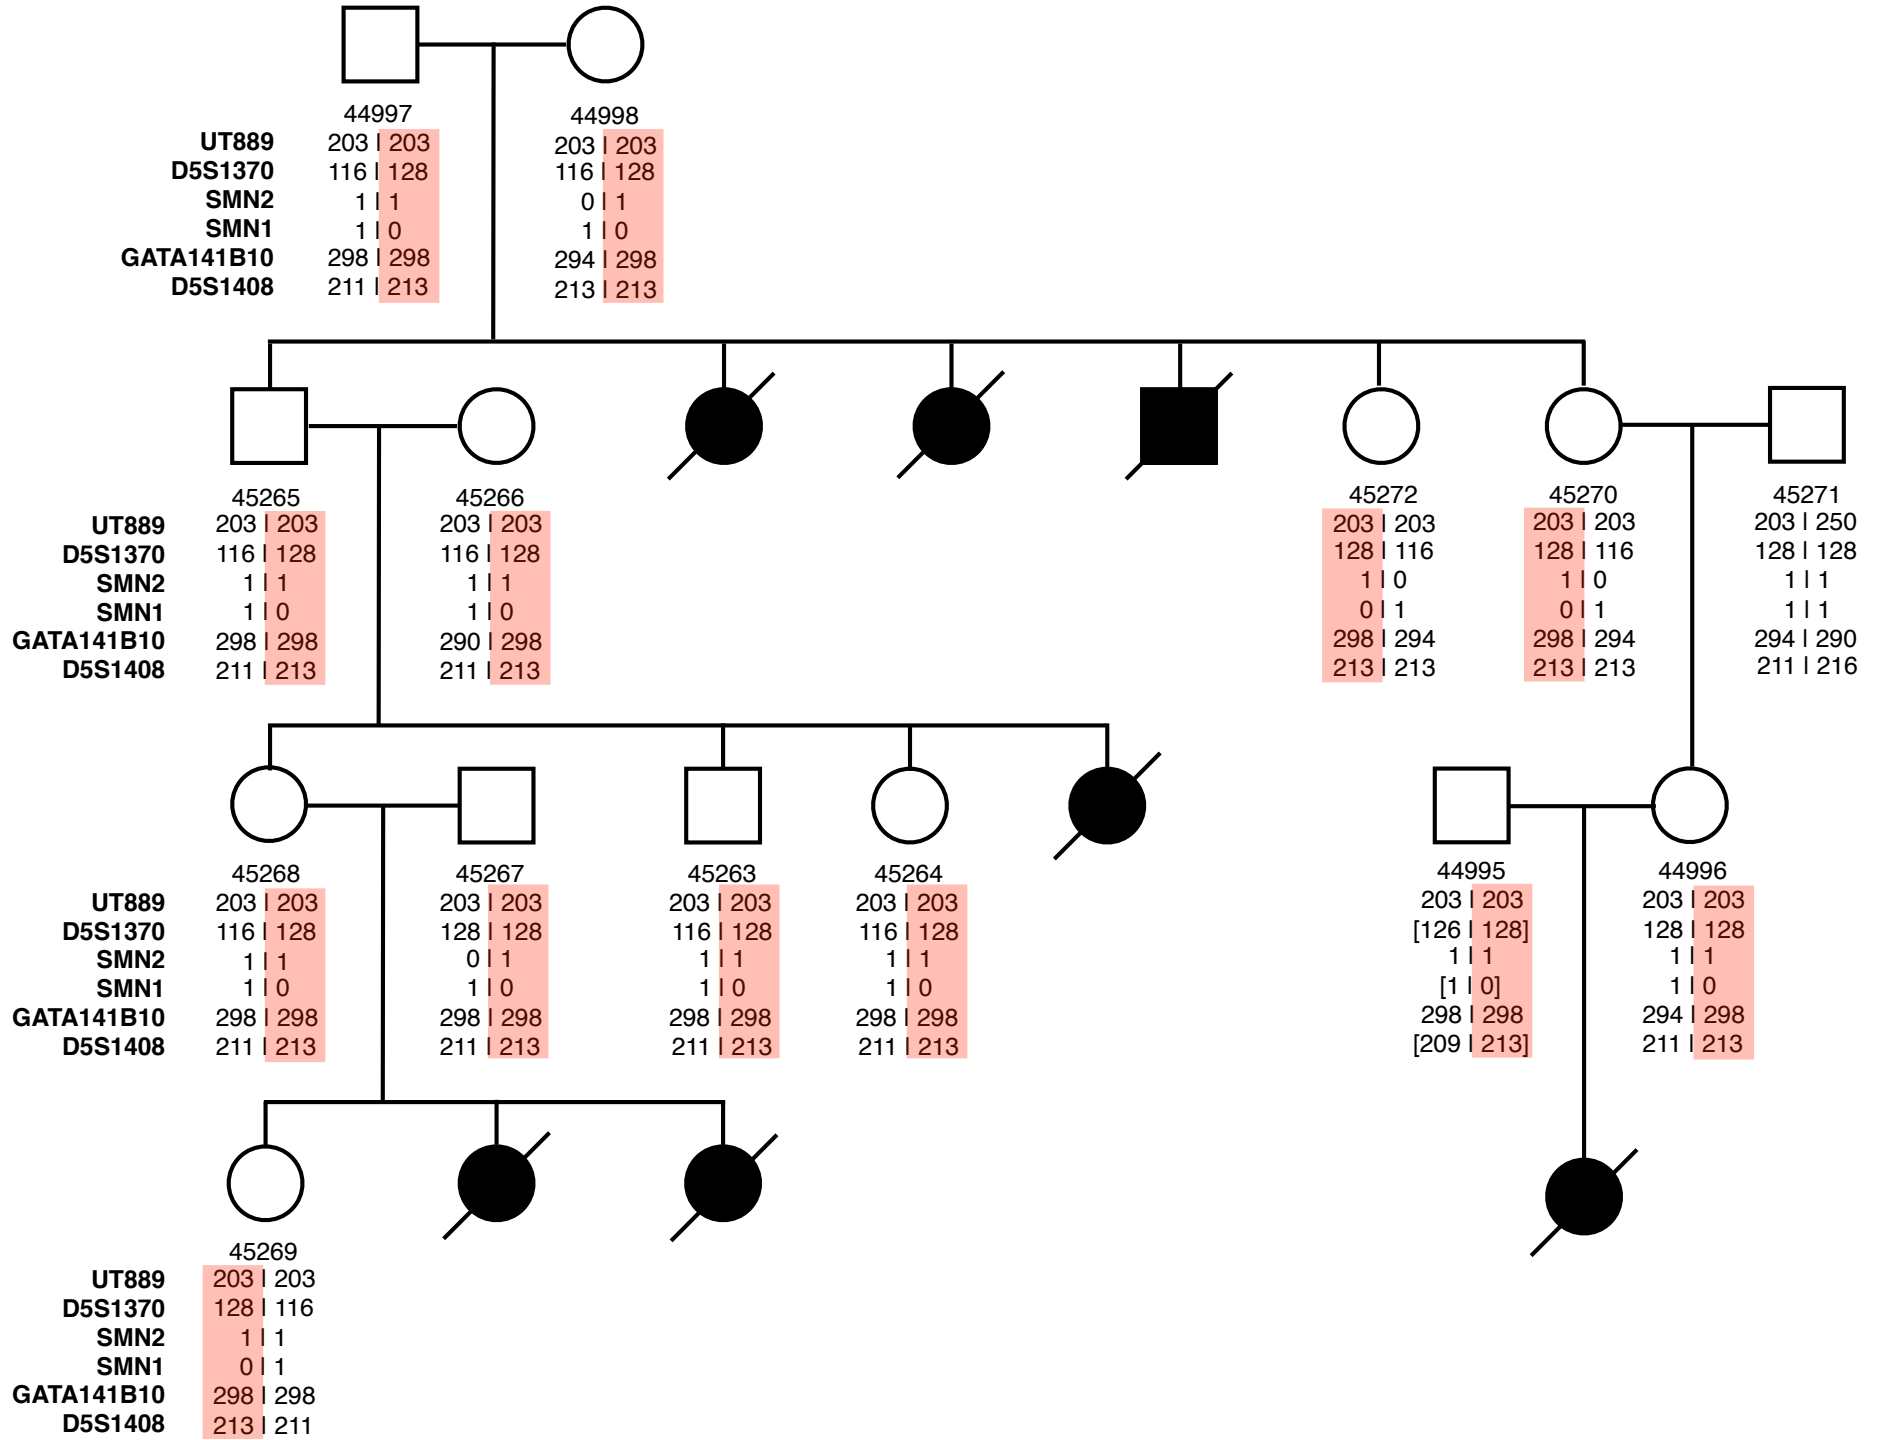

Supplement: pone.0202104.s004.pdf [file pone.0202104.s004.pdf]
